# Supplementary figures and images for: Does DHN-Melanin Always Protect Fungi against Antifungal Drugs? The Fonsecaea/Micafungin Paradigm
Source: MDPI journal article supplement (doi:10.3390/microbiolres13020017), 2022-05-06

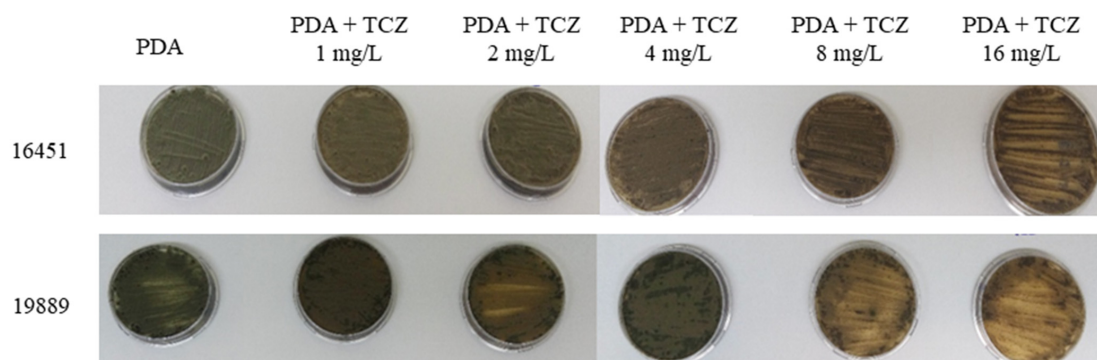

Supplement: s1 [file s1]
